# Supplementary figures and images for: Tobacco smoking induces changes in true DNA methylation, hydroxymethylation and gene expression in bronchoalveolar lavage cells
Source: PubMed Central journal article supplement — eBioMedicine. 2019 Jul 12;46:290–304. doi: 10.1016/j.ebiom.2019.07.006 (PMC6710853; doi:10.1016/j.ebiom.2019.07.006), 2019-07-12

# Probeset TF Associations

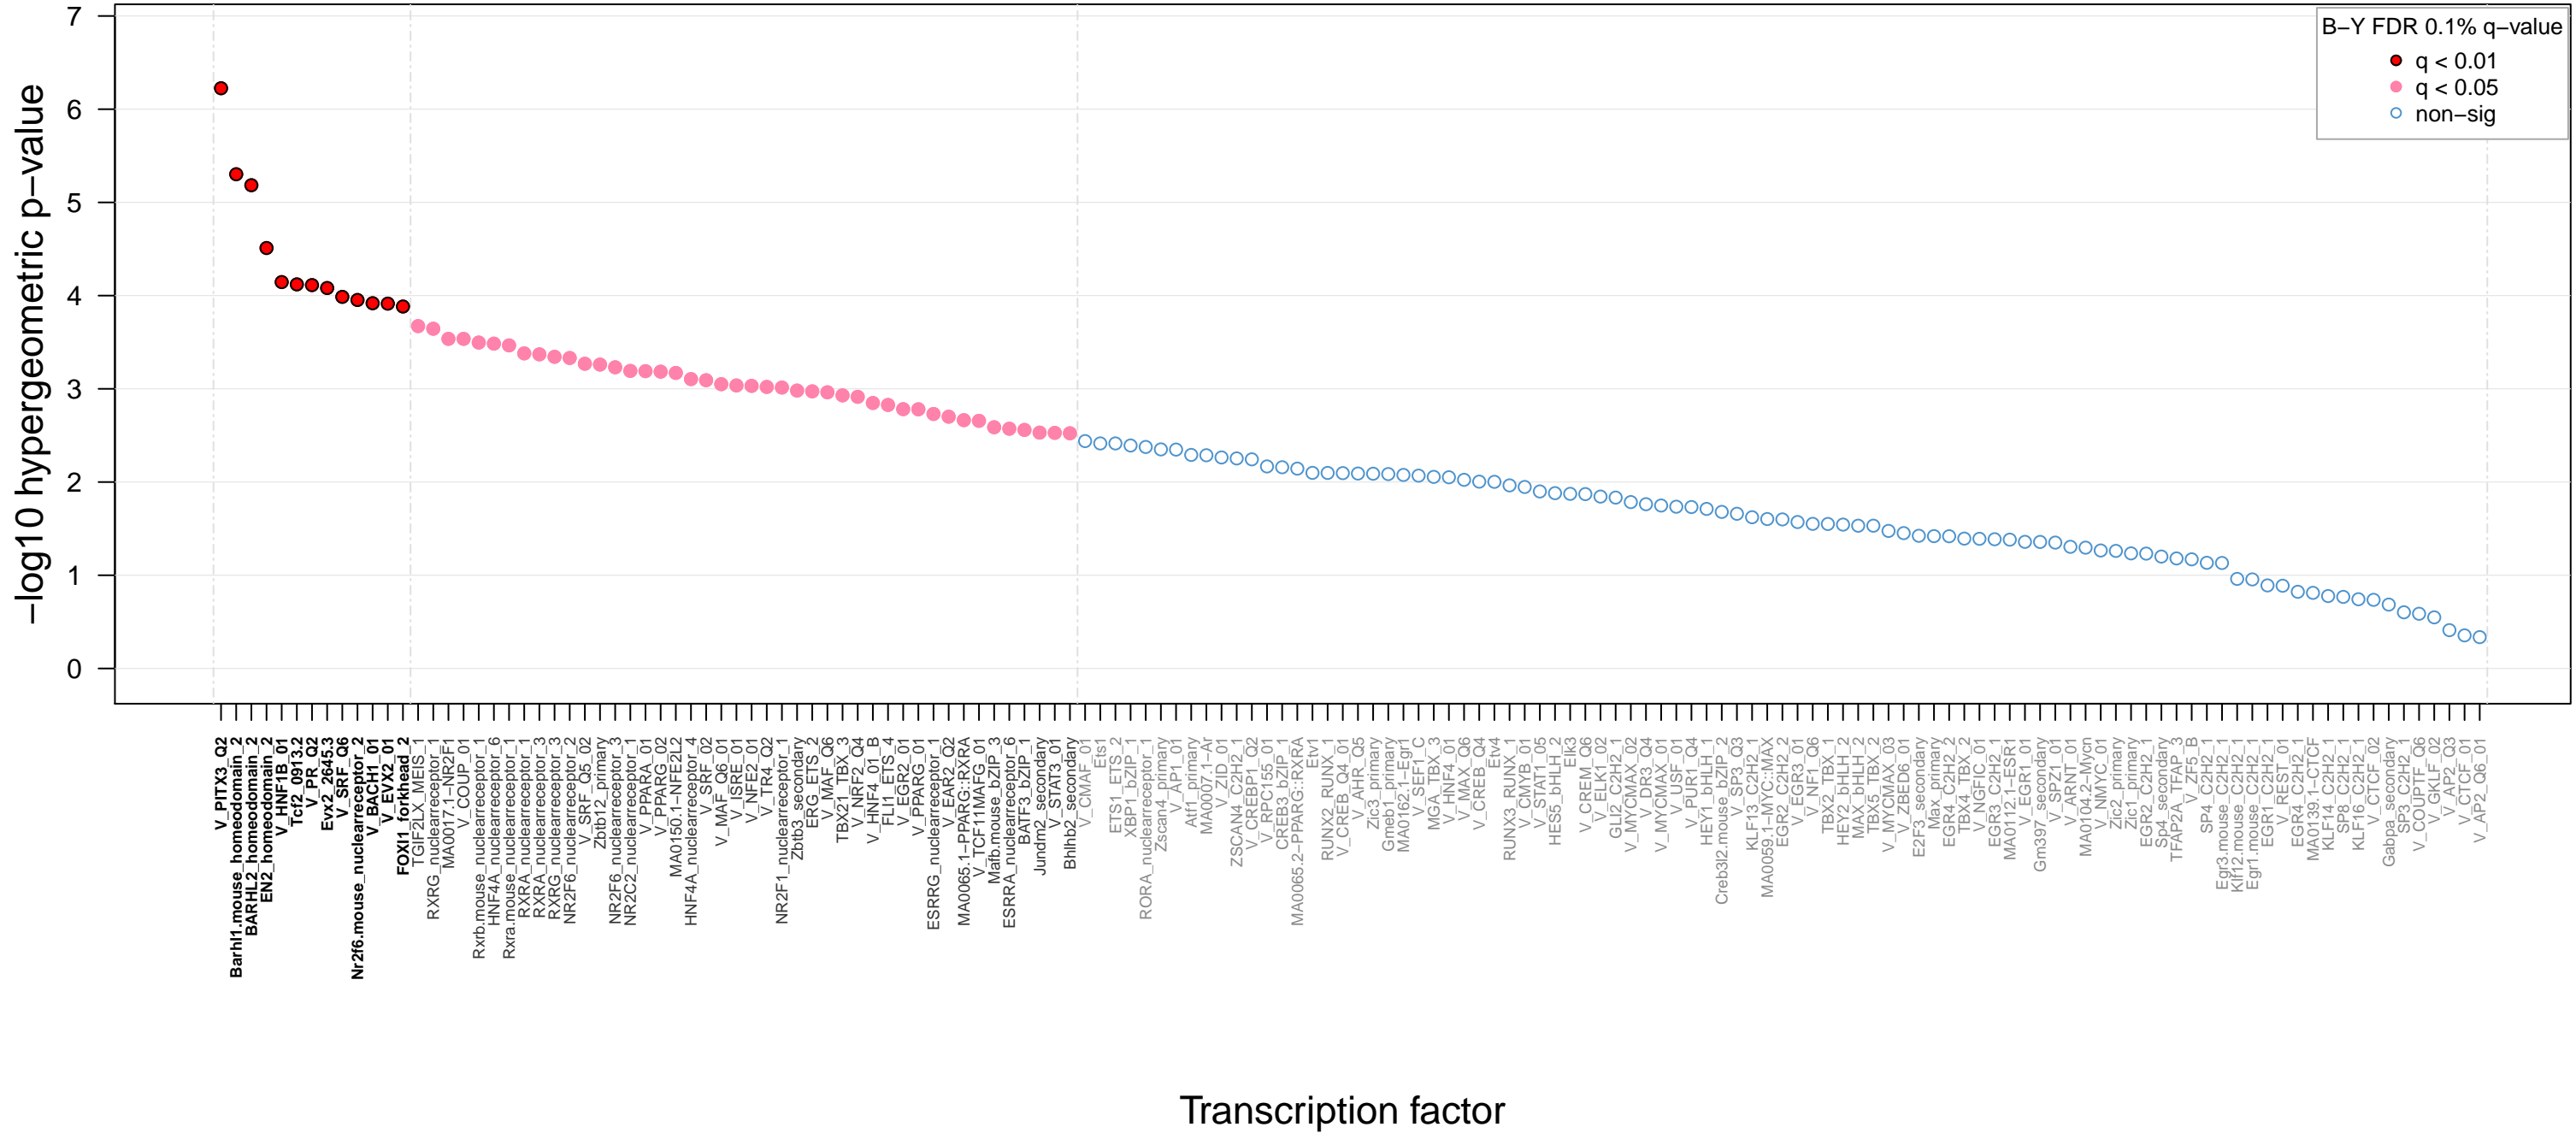

Supplement: mmc12.pdf [file mmc12.pdf]

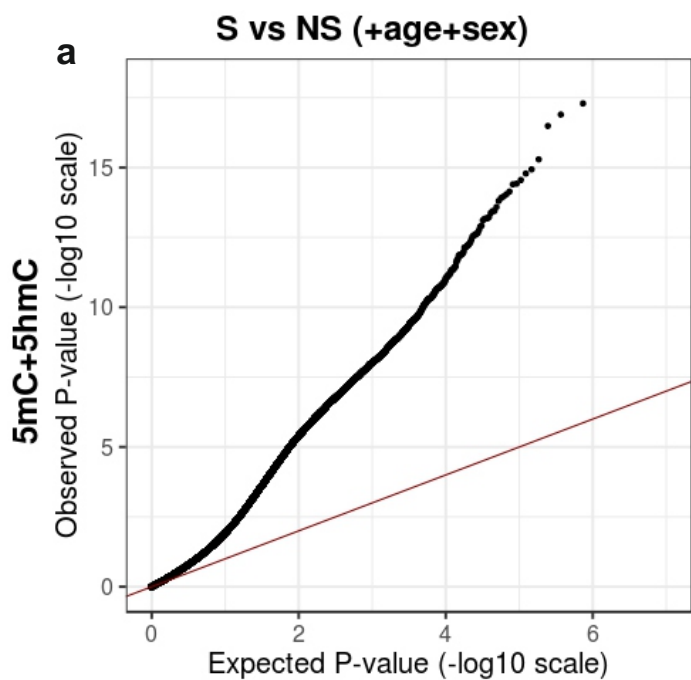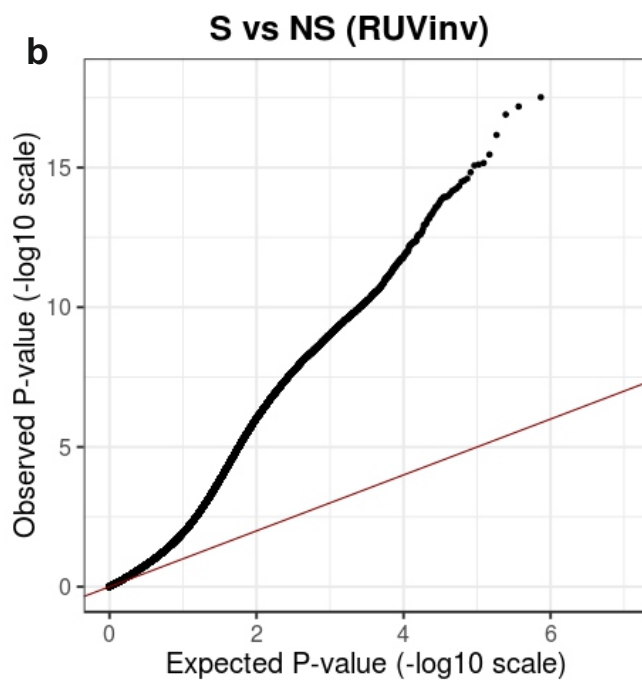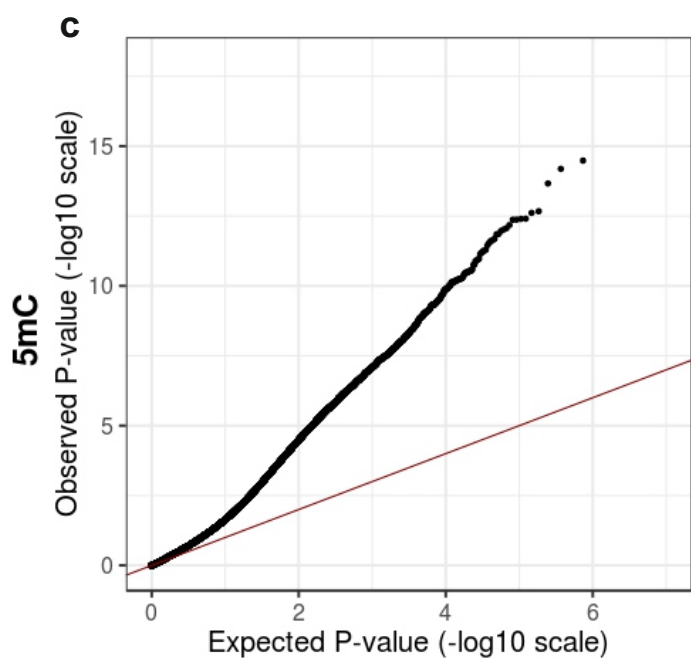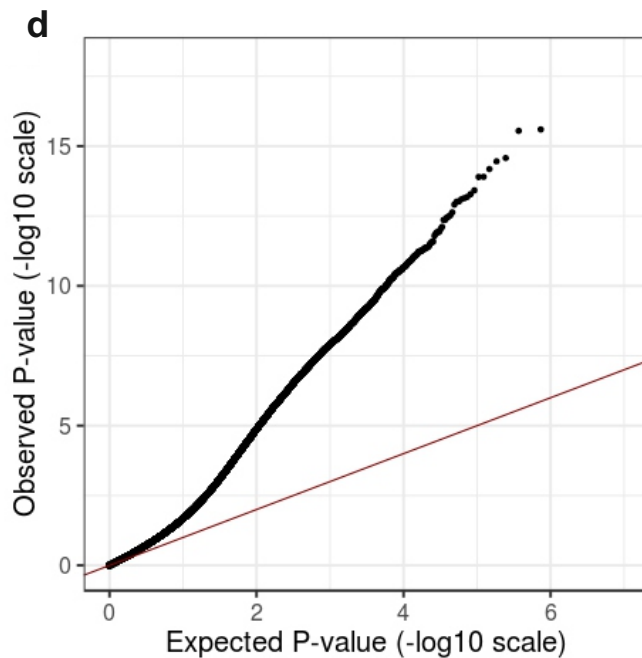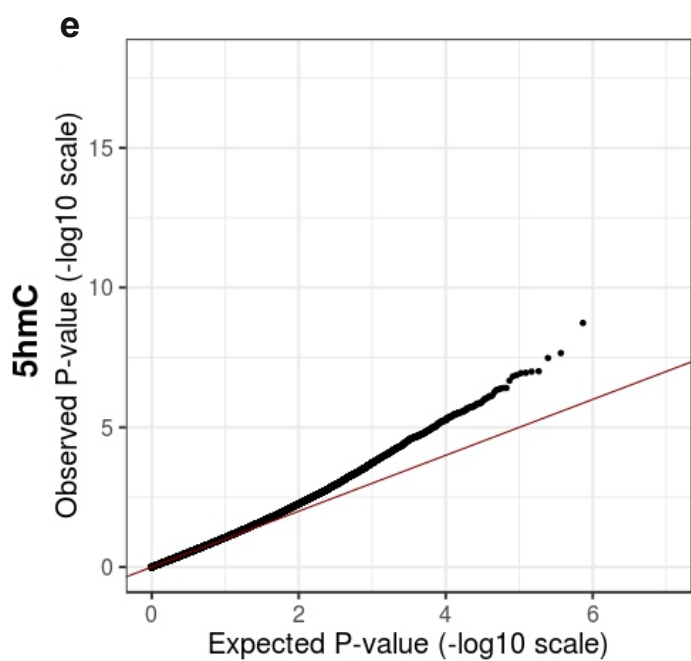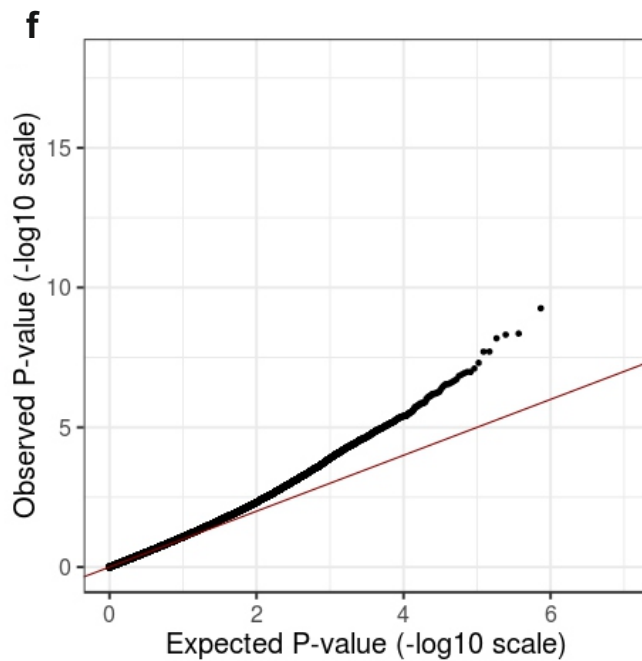

Supplement: mmc4.pdf [file mmc4.pdf]

Mean power curve with 95-percentile interval (2.5% & 97.5%)

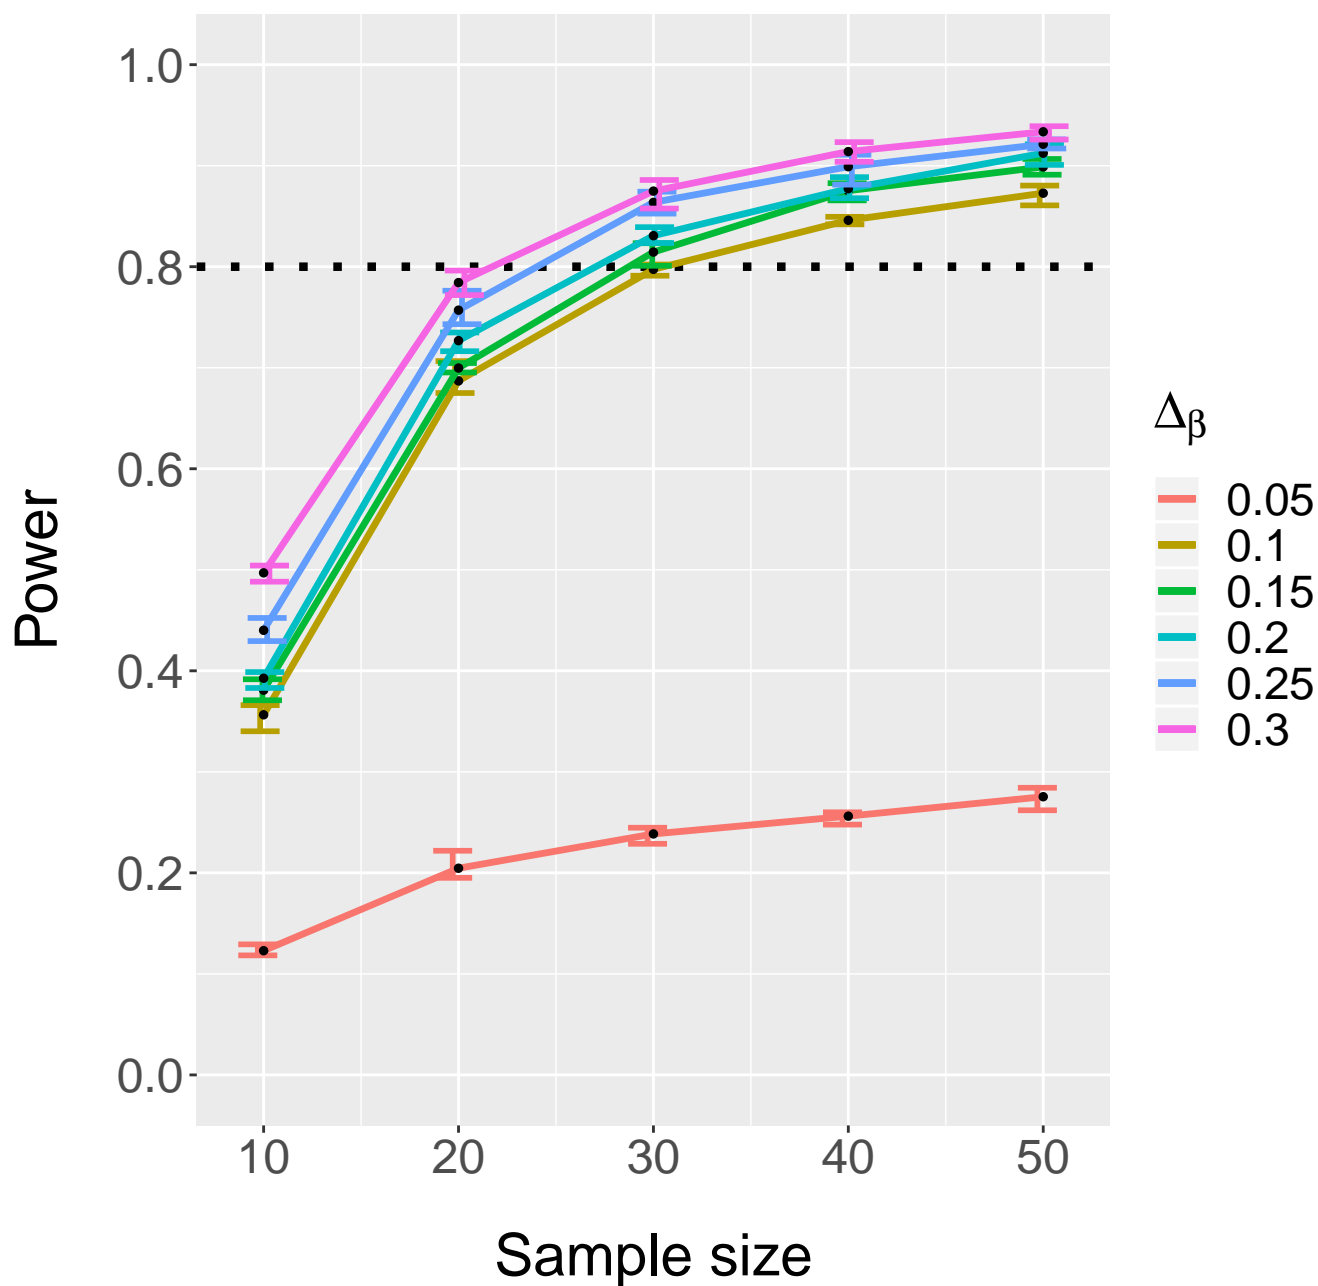

Supplement: mmc5.pdf [file mmc5.pdf]

### Nonsmokers

### Smokers

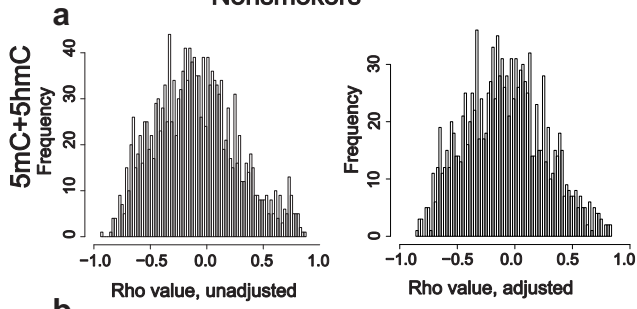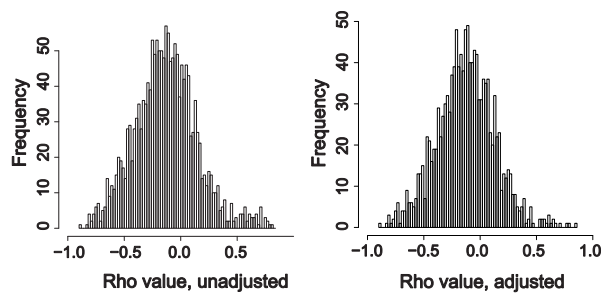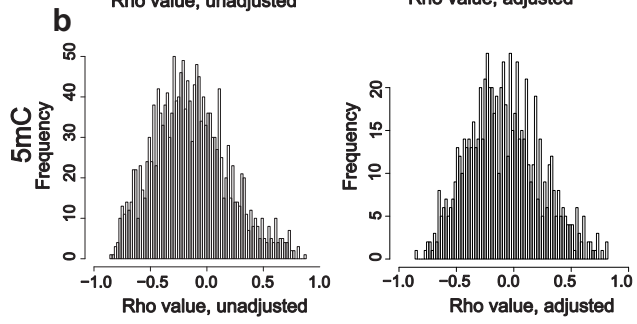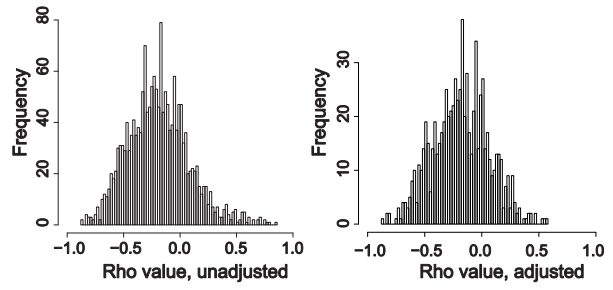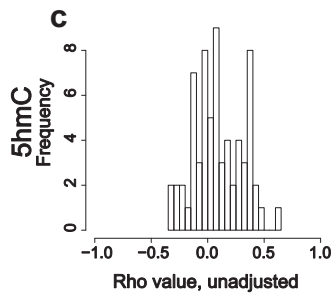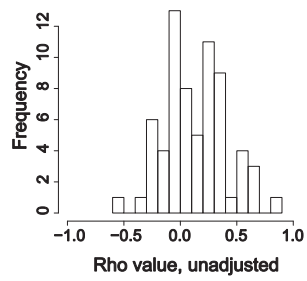

Supplement: mmc6.pdf [file mmc6.pdf]

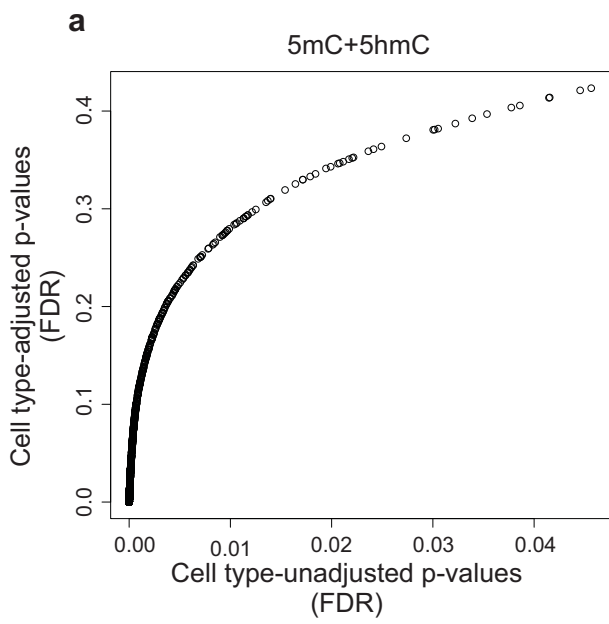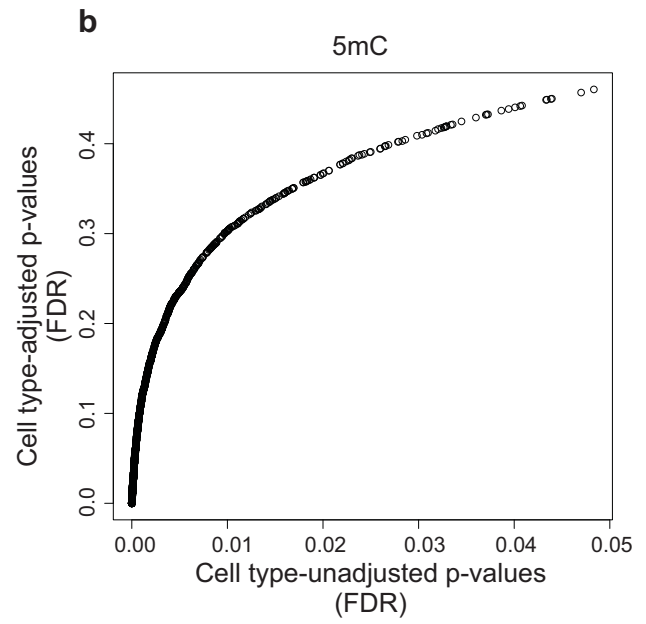

Supplement: mmc7.pdf [file mmc7.pdf]

### 5mC+5hmC DMPs in DNase I HS sites

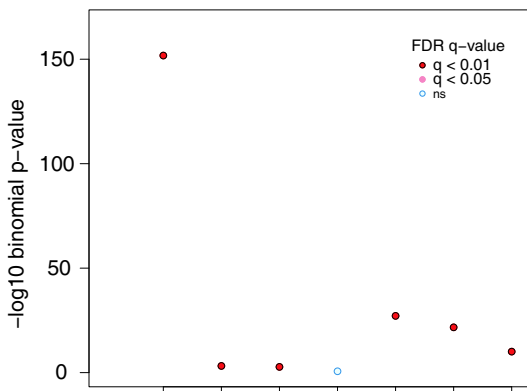

### 5mC DMPs in DNase I HS sites

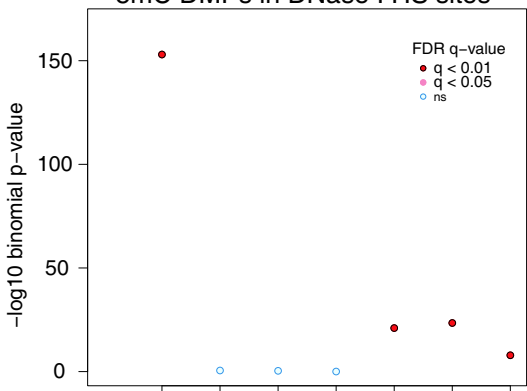

### 5hmC DMPs in DNase I HS sites

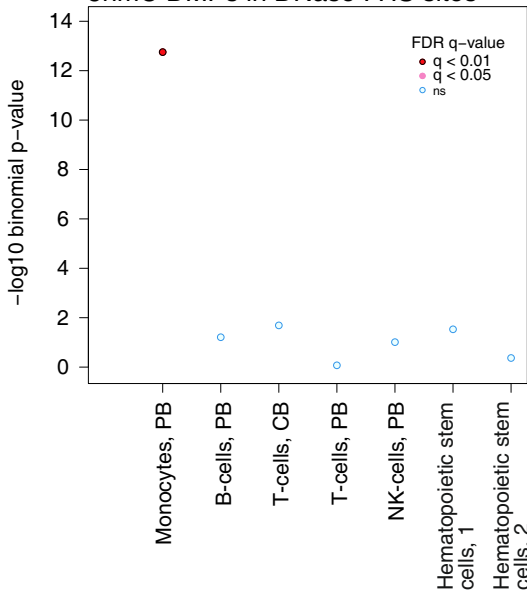

Supplement: mmc8.pdf [file mmc8.pdf]

### ITSN1 methylation

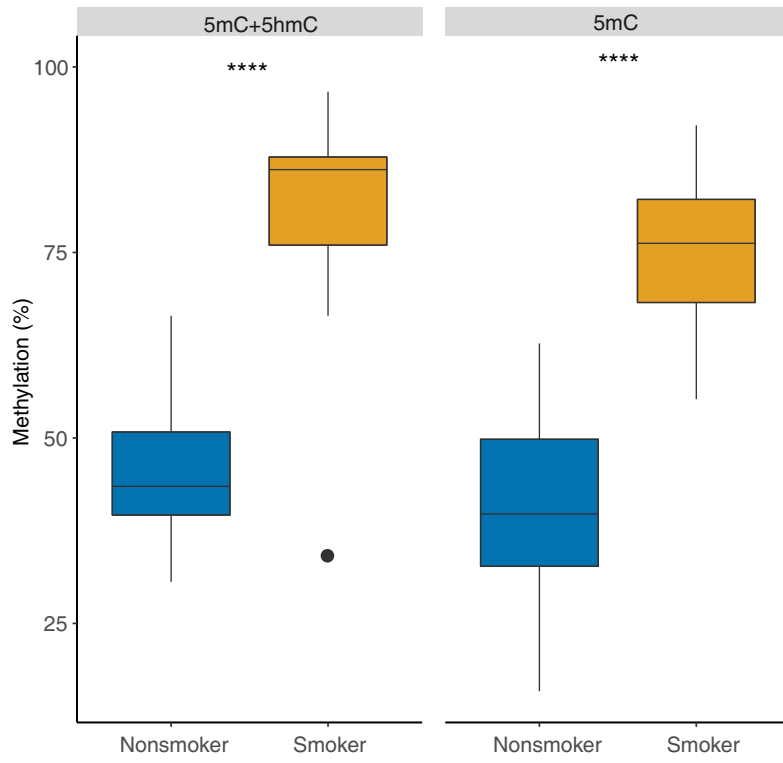

Supplement: mmc9.pdf [file mmc9.pdf]
